# Supplementary material for: Aerogel based SiO2–TiO2 hybrid photoanodes for enhanced light harvesting in dye-sensitized solar cells
Source: Royal Society of Chemistry journal article supplement (doi:10.1039/c2jm33945e), 2012-01-01
Supplement: c2jm33945e.pdf [file c2jm33945e.pdf]

## Supporting Information

### Contents

**Figure S1.** Pore size distribution of  $\text{SiO}_2$  and  $\text{SiO}_2$ - $\text{TiO}_2$  aerogel particles.

**Figure S2.** Pore size distribution of pure  $\text{TiO}_2$  photoanode and typical aerogel photoanode.

**Figure S3.** SEM image of aerogel photoanode with high percentage of aerogel incorporated.

**Figure S4.** Typical J-V curves of DSC based on pure  $\text{TiO}_2$ ,  $\text{SiO}_2$  aerogel and  $\text{SiO}_2$ - $\text{TiO}_2$  hybrid aerogel-modified photoanodes.

**Figure S5.** Electrochemical impedance spectra of DSCs based on pure  $\text{TiO}_2$  and aerogel photoanodes.

**Figure S6.** Open-circuit voltage decay (OCVD) curves of DSCs based on pure  $\text{TiO}_2$  and aerogel photoanodes.

**Figure S7.** External quantum efficiency of DSCs based on pure  $\text{TiO}_2$  and aerogel photoanodes.

**Table S1.** EIS parameters obtained by fitting the Nyquist plots with the equivalent circuit for DSCs based on pure  $\text{TiO}_2$  and aerogel based photoanodes.

**Figure S1.** Pore size distribution of SiO<sub>2</sub> and SiO<sub>2</sub>-TiO<sub>2</sub> aerogel particles obtained from N<sub>2</sub> adsorption-desorption measurement, illustrating the change of the pore size in aerogel with the deposition of TiO<sub>2</sub> nanoparticles deposited on SiO<sub>2</sub> template.

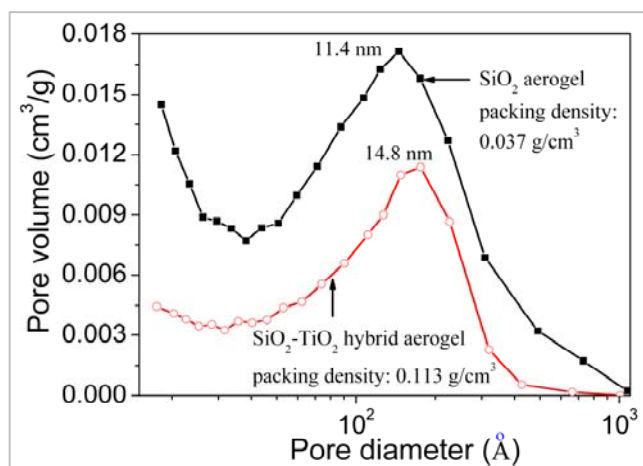

**Figure S2.** Pore size distribution of pure TiO<sub>2</sub> photoanode and SiO<sub>2</sub>-TiO<sub>2</sub> aerogel photoanode obtained from N<sub>2</sub> adsorption-desorption measurement.

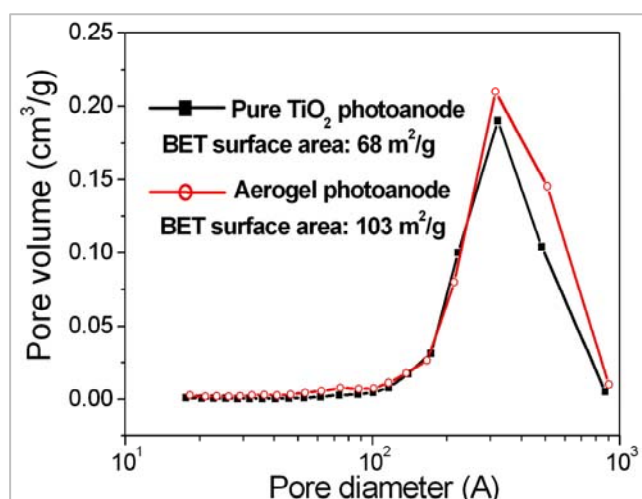

**Figure S3.** SEM image of aerogel based photoanode film with high percentage of  $\text{SiO}_2\text{-TiO}_2$  aerogel incorporated in the slurry of hydrothermal  $\text{TiO}_2$  nanoparticles (ATP value: 30%), illustrating that the large-size aerogel particles may induce large amount of cracks in the film and deteriorate the overall film quality.

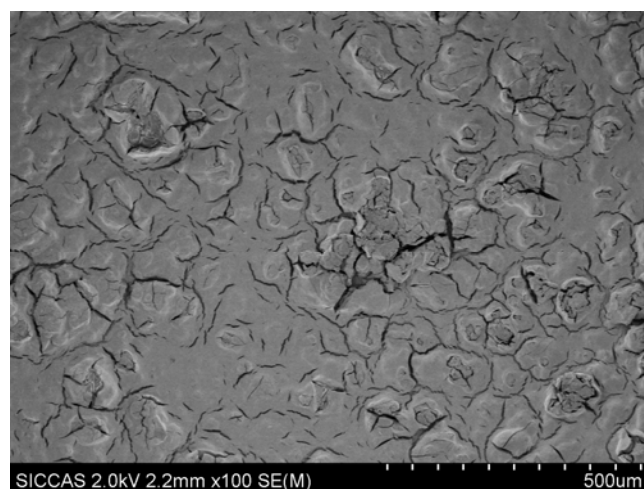

**Figure S4.** Typical J-V curves of DSC based on pure  $\text{TiO}_2$ ,  $\text{SiO}_2$  aerogel and  $\text{SiO}_2\text{-TiO}_2$  hybrid aerogel-modified photoanodes.

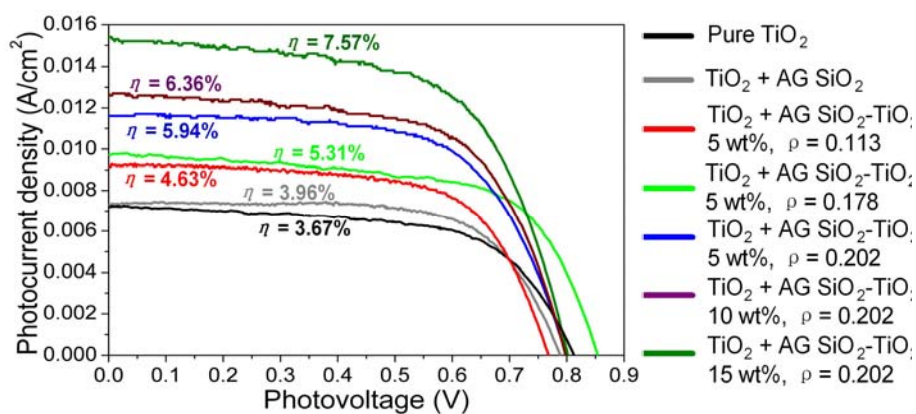

**Figure S5.** a) Electrochemical impedance spectra (left) of DSCs based on pure  $\text{TiO}_2$  and aerogel based photoanodes, illustrating that the aerogel based cell has the similar recombination frequency with the pure  $\text{TiO}_2$  cell. b) Equivalent circuit used for the calculation of EIS parameters.

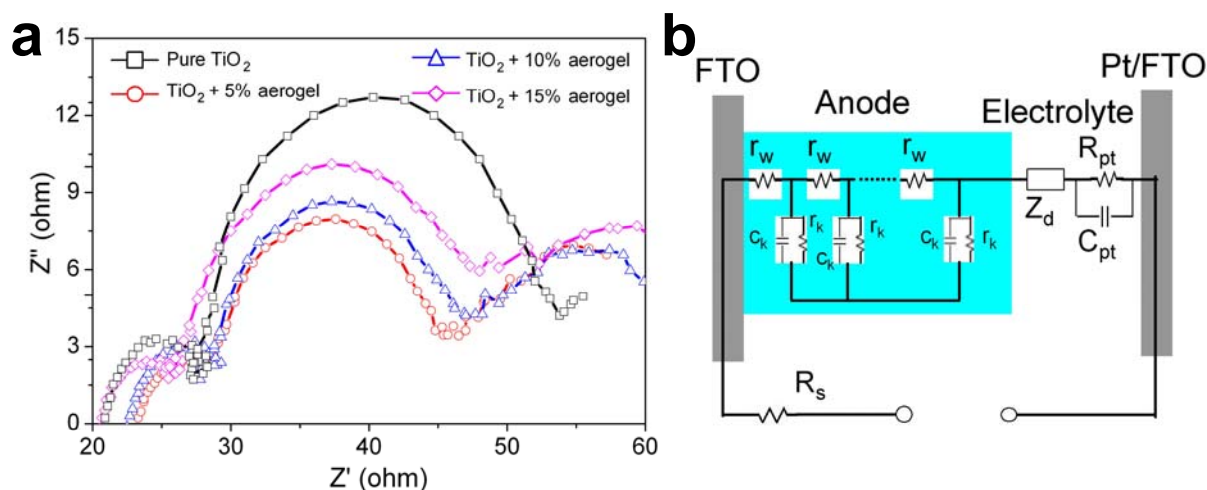

**Figure S6.** Open-circuit voltage decay (OCVD) curves of DSCs based on pure  $\text{TiO}_2$  and aerogel based photoanodes, illustrating that aerogel photoanodes have much faster recombination between electron and the electrolyte than pure  $\text{TiO}_2$  photoanode.

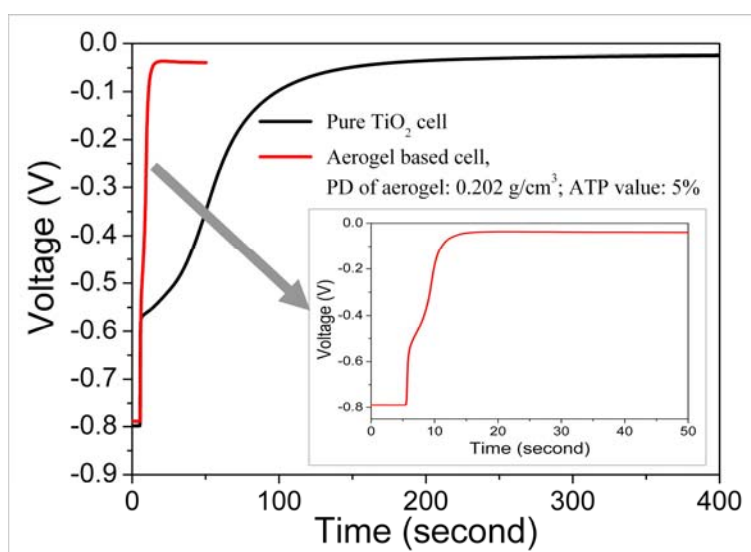

**Figure S7.** External quantum efficiency of DSCs based on pure TiO<sub>2</sub> and aerogel based photoanodes, illustrating that aerogel photoanodes have much higher light-harvesting capacity than pure TiO<sub>2</sub> photoanode.

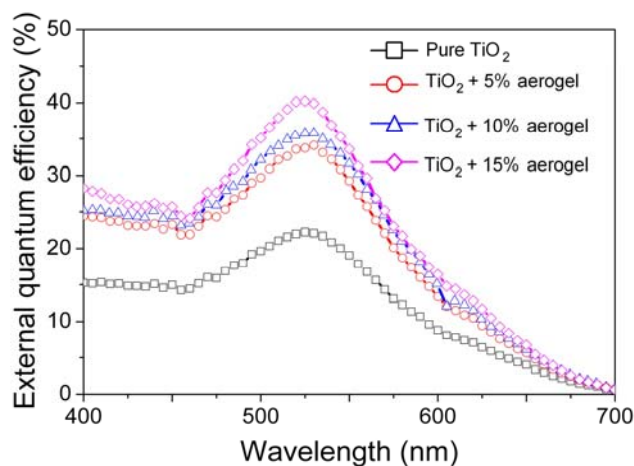

**Table S1.** EIS parameters obtained by fitting the Byquist plots with the equivalent circuit in Figure S5b for DSCs based on pure TiO<sub>2</sub> and aerogel based photoanodes.

| Electrode                                  | R <sub>w</sub><br>(Ω) | R <sub>k</sub><br>(Ω) | k <sub>eff</sub><br>(s <sup>-1</sup> ) | τ <sub>eff</sub><br>(ms) | D <sub>eff</sub><br>(cm <sup>2</sup> /s × 10 <sup>-4</sup> ) |
|--------------------------------------------|-----------------------|-----------------------|----------------------------------------|--------------------------|--------------------------------------------------------------|
| Pure TiO <sub>2</sub>                      | 5.15                  | 130.80                | 25.7                                   | 39                       | 8.93                                                         |
| TiO <sub>2</sub> + 5% aerogel <sup>a</sup> | 4.10                  | 78.89                 | 25.7                                   | 39                       | 5.46                                                         |
| TiO <sub>2</sub> + 10% aerogel             | 4.35                  | 84.46                 | 25.7                                   | 39                       | 5.30                                                         |
| TiO <sub>2</sub> + 15% aerogel             | 4.78                  | 111.30                | 21.23                                  | 47                       | 5.98                                                         |

[a] Packing density of SiO<sub>2</sub>-TiO<sub>2</sub> hybrid aerogel: 0.202 g/cm<sup>3</sup>.
